# Supplementary material for: CRISPRi Induced Suppression of Fimbriae Gene (fimH) of a Uropathogenic Escherichia coli: An Approach to Inhibit Microbial Biofilms
Source: PubMed Central journal article supplement (PMC5694031; doi:10.3389/fimmu.2017.01552), 2017-11-13
Supplement: data_sheet_1.pdf [file data_sheet_1.pdf]

**CRISPRi induced suppression of fimbriae gene (*fimH*) of a Uropathogenic *Escherichia coli* : a novel therapeutic approach against the battle between microbial biofilms and host immunity**

**Azna Zuberi, Nayeem Ahmad and Asad U Khan\***

Medical Microbiology and Molecular Biology Lab., Interdisciplinary Biotechnology Unit,  
Aligarh Muslim University, Aligarh – 202 002, India.

| Name              | Sequence (5'-3')                                        | Purpose                                                        |
|-------------------|---------------------------------------------------------|----------------------------------------------------------------|
| <b>FimH-F</b>     | AATAGGGATAGCGGTACCATGTTTTAGAGCTAGAAATAGCAAGTTAAAATAAGGC | Forward primer used to Insert gene targeting sequence in pgRNA |
| <b>FimH-R</b>     | ACTAGTATTATACCTAGGACTGAGCTAGC                           | Reverse primer used to Insert gene targeting sequence in pgRNA |
| <b>Colony-F</b>   | GGGTTATTGTCTCATGAGCGGATACATATTTG                        | Forward primer for colony PCR                                  |
| <b>Colony-R</b>   | CGCGGCCTTTTTACGGTTC                                     | Reverse primer for colony PCR                                  |
| <b>FimH-rt-F</b>  | GATGCGGGCAACTCGATT                                      | Forward primer for FimH gene RT- PCR                           |
| <b>FimH-rt-R</b>  | CGCCCTGTGCAGGTGAA                                       | Reverse primer for FimH gene RT-PCR                            |
| <b>dCas9-rt-F</b> | CGGAAGCGACTCGTCTCAA                                     | Forward primer for dCas9 RT- PCR                               |
| <b>dCas9-rt-F</b> | CAAATACGATTCTTCCGACGTGTA                                | Reverse primer for dCas9 RT-PCR                                |

**Table 1: Primers used in the study. The highlighted region shows the target *fimH* gene sequence.**

| PCR TYPE                               | CYCLE NUMBER | DENATURING   | ANNEALING  | EXTENTION    |
|----------------------------------------|--------------|--------------|------------|--------------|
| <b>INVERSE PCR</b>                     | 1            | 98°C, 30 s   |            |              |
|                                        | 2-26         | 98°C, 10 s   | 62°C, 30 s | 72°C, 1 min  |
|                                        | 27           |              |            | 72°C, 5 min  |
| <b>COLONY PCR</b>                      | 1            | 95°C, 3 min  |            |              |
|                                        | 2-31         | 95°C, 30 s   | 62°C, 30 s | 72°C, 2 min  |
|                                        | 32           |              |            | 72°C, 5 min  |
| <b>qRT-PCR (<i>fimH</i> and dCas9)</b> | 1            | 95°C, 10 min |            |              |
|                                        | 2-39         | 95°C, 15 s   | 60°C, 30s  | 72°C, 30 sec |
|                                        | 40           |              |            | 72°C, 7 min  |

**Table 2: Conditions used in PCR.**
